# Supplementary material for: Evaluating the impact of an educational self-care intervention on the empowerment of primigravida pregnant women covered by family medicine program in the Estahban City—an application of the Pender's health promotion model
Source: Research Square preprint supplement (doi:10.21203/rs.3.rs-5296026/v1), 2024-10-28
Supplement: Supplementary file 1 [file 4f1a51376bceb9f5406356b0.pdf]

| Variables                         | Group                                                     | Before intervention |                       | After intervention |                       | P value<br>Pair T test* | Effect size<br>(Cohen's d) |
|-----------------------------------|-----------------------------------------------------------|---------------------|-----------------------|--------------------|-----------------------|-------------------------|----------------------------|
|                                   |                                                           | Mean                | Standard<br>Deviation | Mean               | Standard<br>Deviation |                         |                            |
| Perceived Benefits                | Intervention                                              | 24/91               | 2/59                  | 28/19              | 1/54                  | <0/001                  | 0/301                      |
|                                   | Control                                                   | 25/67               | 2/44                  | 26/56              | 1/96                  | 0/496                   |                            |
|                                   | p-value**                                                 | 0/152               |                       | <0/001             |                       |                         |                            |
| Perceived Barriers                | Intervention                                              | 18/47               | 6/22                  | 15/91              | 3/74                  | 0/019                   | 0/219                      |
|                                   | Control                                                   | 20/17               | 6/53                  | 19/50              | 6/72                  | 0/65                    |                            |
|                                   | p-value**                                                 | 0/20                |                       | 0/002              |                       |                         |                            |
| commitment to a plan of<br>action | Intervention                                              | 38/54               | 5/81                  | 42/65              | 2/86                  | <0/001                  | 0/441                      |
|                                   | Control                                                   | 41/00               | 5/30                  | 41/50              | 5/11                  | 0/557                   |                            |
|                                   | p-value**                                                 | 0/06                |                       | 0/007              |                       |                         |                            |
| Interpersonal influences          | Intervention                                              | 26/91               | 2/81                  | 27/39              | 2/08                  | 0/288                   | 0/109                      |
|                                   | Control                                                   | 25/65               | 3/30                  | 25/76              | 2/99                  | 0/872                   |                            |
|                                   | p-value**                                                 | 0/052               |                       | 0/017              |                       |                         |                            |
| Self_care Behaviour               | Intervention                                              | 17/50               | 3/95                  | 22/36              | 4/14                  | <0/001                  | 0/489                      |
|                                   | Control                                                   | 15/52               | 4/50                  | 16/10              | 4/56                  | 0/512                   |                            |
|                                   | p-value**                                                 | 0/652               |                       | <0/001             |                       |                         |                            |
|                                   | **Independent Samples t-test      * Paired Samples t-test |                     |                       |                    |                       |                         |                            |

Table 2: Comparison of the mean values of the constructs of Pender's health promotion model within and between the intervention and control groups of pregnant women before and after the intervention
