# Supplementary material for: Evaluating the impact of an educational self-care intervention on the empowerment of primigravida pregnant women covered by family medicine program in the Estahban City—an application of the Pender's health promotion model
Source: Research Square preprint supplement (doi:10.21203/rs.3.rs-5296026/v1), 2024-10-28
Supplement: Supplementary file 2 [file 93ba9829ab10eee5575cfa90.pdf]

| Demographic variables |                                      | Intervention group |        | Control group |        | P value |
|-----------------------|--------------------------------------|--------------------|--------|---------------|--------|---------|
|                       |                                      | Percent            | Number | Percent       | Number |         |
| Age                   | 30 years old and under 30 years old  | 57/5%              | 23     | 42/5%         | 17     | 0/91    |
|                       | over 30 years old                    | 42/5%              | 17     | 57/5%         | 23     |         |
| Education             | under diploma                        | 42/5%              | 17     | 55%           | 22     | 0/263   |
|                       | postgraduate diploma and above       | 57/5%              | 23     | 45%           | 18     |         |
| Job situation         | without job                          | 87/5%              | 35     | 97/5%         | 39     | 0/09    |
|                       | Employed                             | 12/5%              | 5      | 2/5%          | 1      |         |
| Economic situation    | not enough for daily living expenses | 25%                | 10     | 20%           | 8      | 0/751   |
|                       | enough for daily living expenses     | 72/5%              | 29     | 75%           | 30     |         |
|                       | above daily living expenses          | 2/5%               | 1      | 5%            | 2      |         |
| Abortion experience   | has abortion experience              | 20%                | 8      | 22/5%         | 9      | 0/785   |
|                       | no abortion experience               | 80%                | 32     | 77/5%         | 31     |         |
| Type of pregnancy     | Intended                             | 87/5%              | 35     | 70%           | 28     | 0/056   |
|                       | Unintended                           | 12/5%              | 5      | 30%           | 12     |         |

Table 1: Comparison of demographic variables between the control and intervention groups
