# Supplementary material for: Evaluating the impact of an educational self-care intervention on the empowerment of primigravida pregnant women covered by family medicine program in the Estahban City—an application of the Pender's health promotion model
Source: Research Square preprint supplement (doi:10.21203/rs.3.rs-5296026/v1), 2024-10-28
Supplement: Supplementary file 3 [file cbc11e442c16a9c8239bb3ed.pdf]

| Variables                            | Group                                                     | Before intervention |                       | After intervention |                       | P value<br>Pair T test* | Effect size<br>(Cohen's d) |
|--------------------------------------|-----------------------------------------------------------|---------------------|-----------------------|--------------------|-----------------------|-------------------------|----------------------------|
|                                      |                                                           | Mean                | Standard<br>Deviation | Mean               | Standard<br>Deviation |                         |                            |
| Self_efficacy                        | Intervention                                              | 20/58               | 2/97                  | 22/30              | 2/37                  | 0/001                   | 0/185                      |
|                                      | Control                                                   | 20/24               | 3/00                  | 20/58              | 2/80                  | 0/55                    |                            |
|                                      | p-value**                                                 | 0/586               |                       | 0/002              |                       |                         |                            |
| future image                         | Intervention                                              | 21/00               | 3/67                  | 21/52              | 2/32                  | 0/368                   | 0/038                      |
|                                      | Control                                                   | 20/97               | 3/34                  | 21/10              | 3/28                  | 0/851                   |                            |
|                                      | p-value**                                                 | 0/46                |                       | 0/021              |                       |                         |                            |
| Self_esteem                          | Intervention                                              | 21/34               | 2/28                  | 22/10              | 1/77                  | 0/05                    | 0/131                      |
|                                      | Control                                                   | 21/69               | 2/97                  | 21/89              | 2/47                  | 0/512                   |                            |
|                                      | p-value**                                                 | 0/531               |                       | 0/037              |                       |                         |                            |
| support and assurance from<br>others | Intervention                                              | 16/91               | 2/72                  | 17/50              | 1/64                  | 0/197                   | 0/167                      |
|                                      | Control                                                   | 15/93               | 3/02                  | 15/80              | 2/91                  | 0/842                   |                            |
|                                      | p-value**                                                 | 0/106               |                       | 0/001              |                       |                         |                            |
| joy of an addition to the<br>family  | Intervention                                              | 18/19               | 2/10                  | 18/39              | 1/66                  | 0/565                   | 0/012                      |
|                                      | Control                                                   | 17/10               | 2/53                  | 17/15              | 2/22                  | 0/934                   |                            |
|                                      | p-value**                                                 | 0/485               |                       | 0/002              |                       |                         |                            |
|                                      | **Independent Samples t-test      * Paired Samples t-test |                     |                       |                    |                       |                         |                            |

Table 3: Comparison of the mean scores of empowerment subscales within and between groups in the intervention and control groups of pregnant women, before and after the intervention.
